# Supplementary material
Source: PubMed Central journal article supplement (PMC4742409)

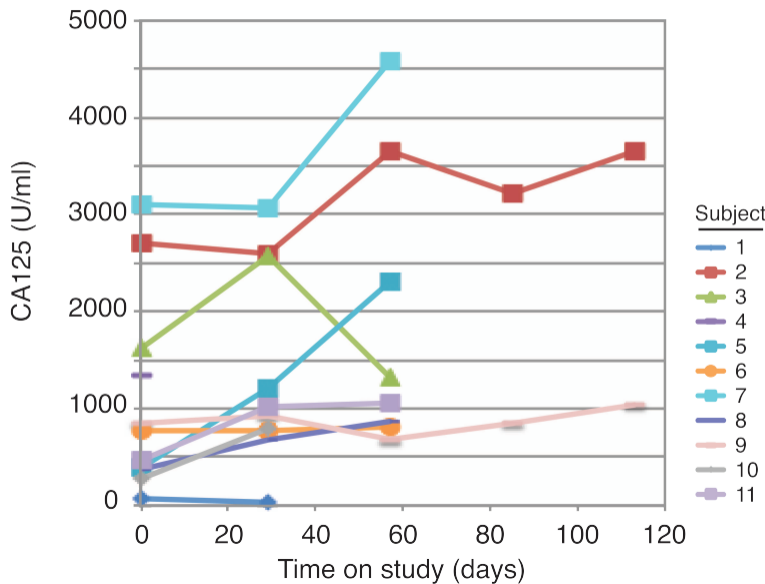

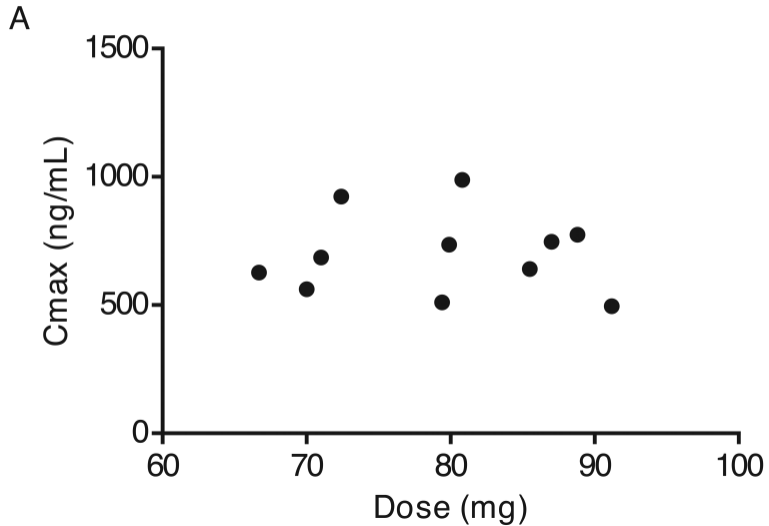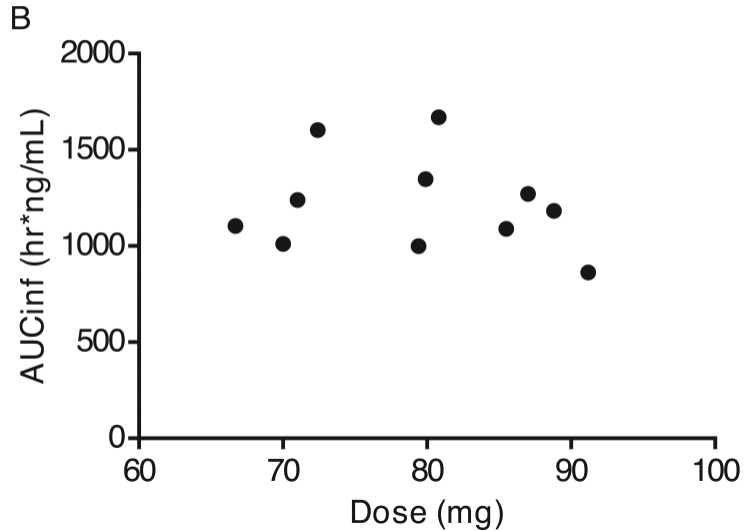

Supplement: NIHMS733573-supplement-Supp_FigureS1-s2.pdf [file NIHMS733573-supplement-Supp_FigureS1-s2.pdf]
